# Supplementary material for: Effects of laughter therapy on quality of life in patients with cancer: An open-label, randomized controlled trial
Source: PubMed Central journal article supplement (PMC6597115; doi:10.1371/journal.pone.0219065), 2019-06-27
Supplement: pone.0219065.s005.pdf [file pone.0219065.s005.pdf]

## Laughter Therapy Session Protocol

Held at the Hall on the 1st floor, Osaka International Cancer Institute, Osaka, Japan

### Week 1 (Thursday, May 18, 2017)

- 2:00 pm: Greeting from the hospital president, director, or investigator
- 2:05 pm: Laughter yoga
- 2:15 pm: *Rakugo* Part 1
- 2:25 pm: *Rakugo* Part 2
- 2:40 pm: *Rakugo* Part 3
- 3:00 pm (end of the session)

### Week 3 (Thursday, June 1, 2017)

- 2:00 pm: Greeting from the hospital president, director, or investigator
- 2:05 pm: Laughter yoga
- 2:15 pm: *Manzai* Part 1
- 2:30 pm: *Manzai* Part 2
- 2:45 pm: *Manzai* Part 3
- 3:00 pm (end of the session)

### Week 5 (Thursday, June 15, 2017)

- 2:00 pm: Greeting from the hospital president, director, or investigator
- 2:05 pm: Laughter yoga
- 2:15 pm: *Manzai* Part 1
- 2:25 pm: *Manzai* Part 2
- 2:40 pm: *Manzai* Part 3
- 3:00 pm (end of the session)

### Week 7 (Thursday, June 29, 2017)

- 2:00 pm: Greeting from the hospital president, director, or investigator
- 2:05 pm: Laughter yoga
- 2:15 pm: *Rakugo* Part 1
- 2:25 pm: *Rakugo* Part 2
- 2:35 pm: *Rakugo* Part 3
- 2:45 pm: *Rakugo* Part 4
- 3:00 pm (end of the session)

Week 9 (Thursday, July 13, 2017)

- 2:00 pm: Greeting from the hospital president, director, or investigator
- 2:05 pm: Laughter yoga
- 2:15 pm: *Manzai* Part 1
- 2:25 pm: *Manzai* Part 2
- 2:40 pm: *Manzai* Part 3
- 3:00 pm (end of the session)

Week 11 (Thursday, July 27, 2017)

- 2:00 pm: Greeting from the hospital president, director, or investigator
- 2:05 pm: Laughter yoga
- 2:15 pm: *Manzai* Part 1
- 2:25 pm: *Manzai* Part 2
- 2:40 pm: *Manzai* Part 3
- 3:00 pm (end of the session)

Week 13 (Thursday, August 10, 2017)

- 2:00 pm: Greeting from the hospital president, director, or investigator
- 2:05 pm: Laughter yoga
- 2:15 pm: *Rakugo* Part 1
- 2:25 pm: *Rakugo* Part 2
- 2:35 pm: *Rakugo* Part 3
- 2:45 pm: *Rakugo* Part 4
- 3:00 pm (end of the session)

Week 15 (Thursday, August 24, 2017)

- 2:00 pm: Greeting from the hospital president, director, or investigator
- 2:05 pm: Laughter yoga
- 2:15 pm: *Rakugo* Part 1
- 2:35 pm: *Rakugo* Part 2
- 3:00 pm (end of the session)

The laughter yoga sessions were led by a professional laughter yoga therapist. Investigators were present throughout the therapy sessions. The *Rakugo* and *Manzai* comedy sessions were conducted by a variety of professional performers dispatched by a local entertainment agency; the content of the comedy performances was decided by each performer.
